# Supplementary material for: Carbon-doped ZnO submicron spheres functionalized with carboxylate groups and effect of dispersion stability in the colloidal system for high photocatalytic activity
Source: Royal Society of Chemistry journal article supplement (doi:10.1039/c5ra21265k), 2015-01-01
Supplement: c5ra21265k1.pdf [file c5ra21265k1.pdf]

# Supporting Information

## **Carbon-doped ZnO Submicron Spheres Functionalized with Carboxylate Groups and Effect of Dispersion Stability in the Colloidal System for High Photocatalytic Activity**

JaeSoul Lee<sup>‡a</sup>, Hyung-Seok Lim<sup>‡a</sup> and Kyung-Do Suh<sup>\*a</sup>

---

<sup>b</sup>Department of Chemical Engineering, College of Engineering, Hanyang University, Seoul, Republic of Korea, 133-791. E-mail: kdsuh@hanyang.ac.kr

\* Corresponding author (kdsuh@hanyang.ac.kr)

‡ These authors contributed equally to this work.

## Supporting information

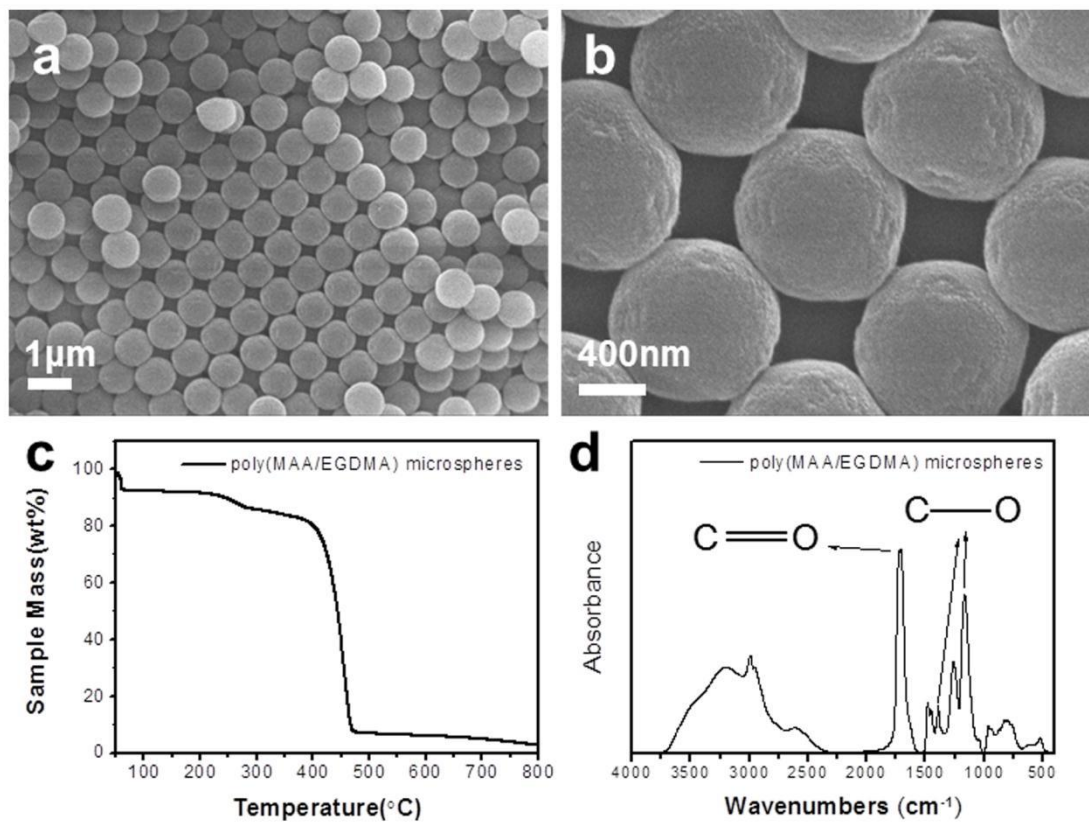

< Figure S1>

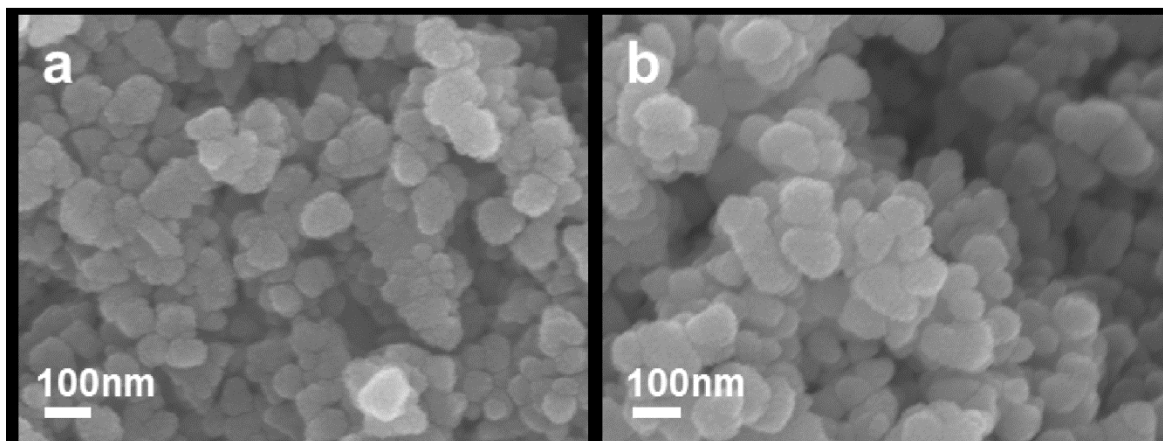

< Figure S2>

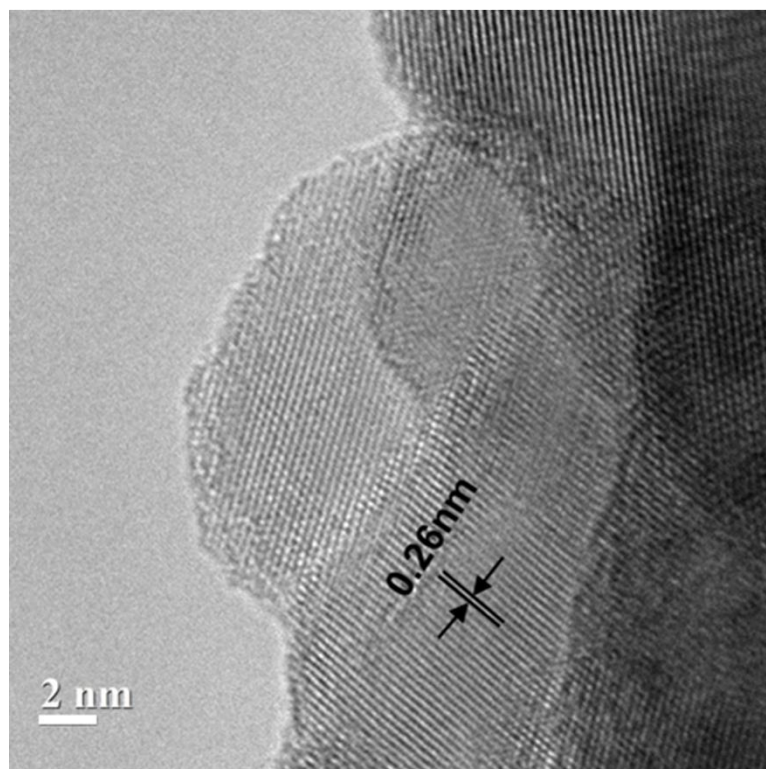

< Figure S3 >

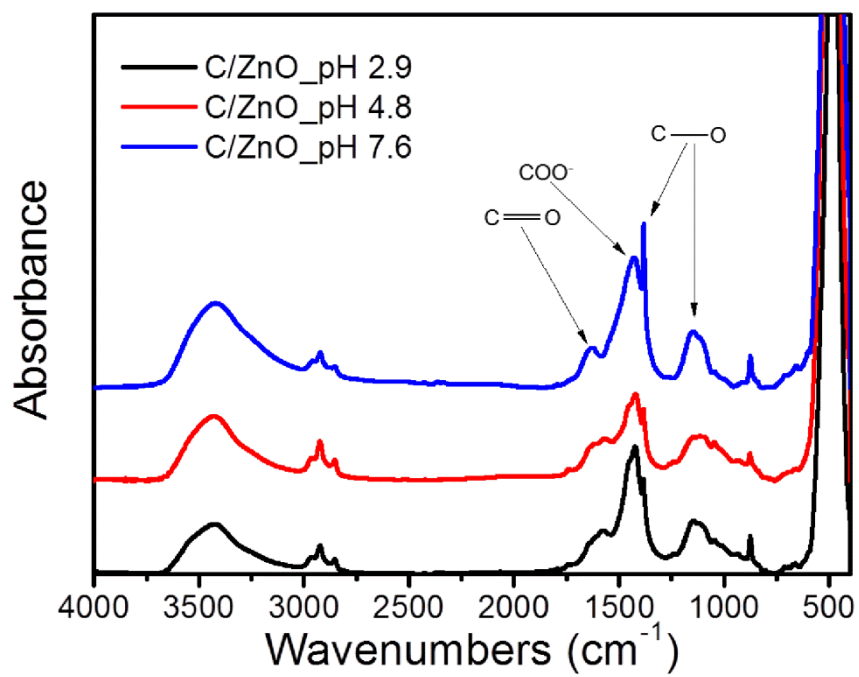

< Figure S4 >

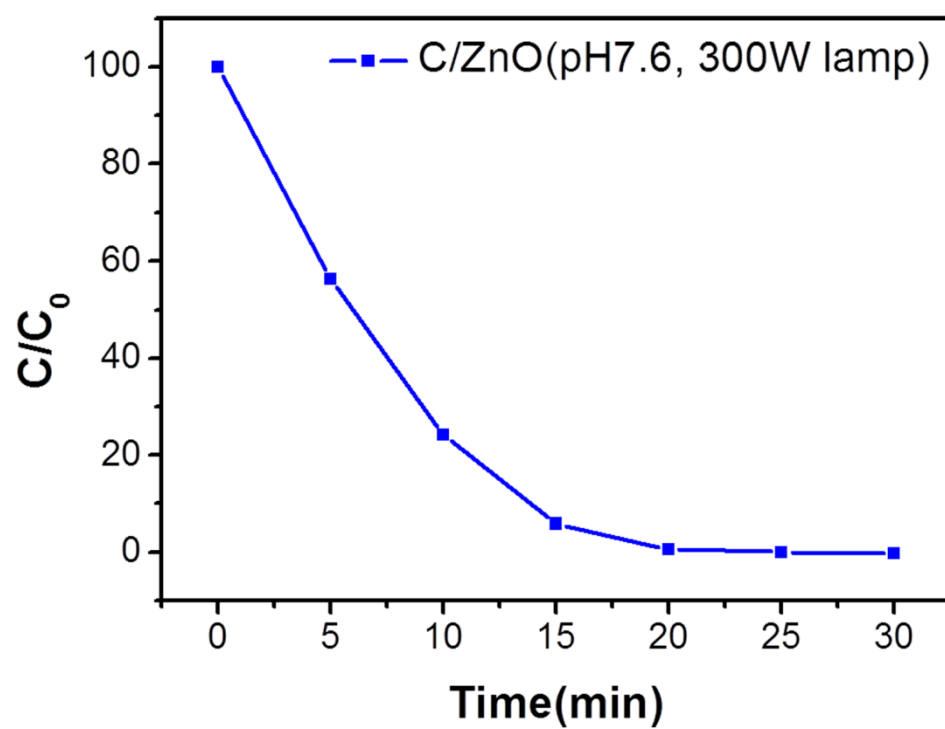

< Figure S5 >

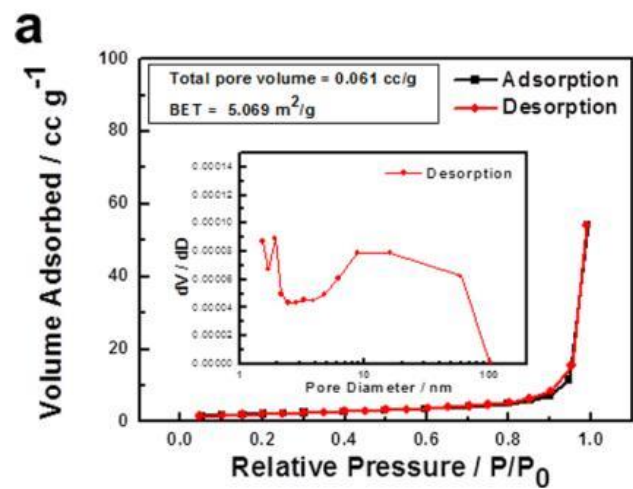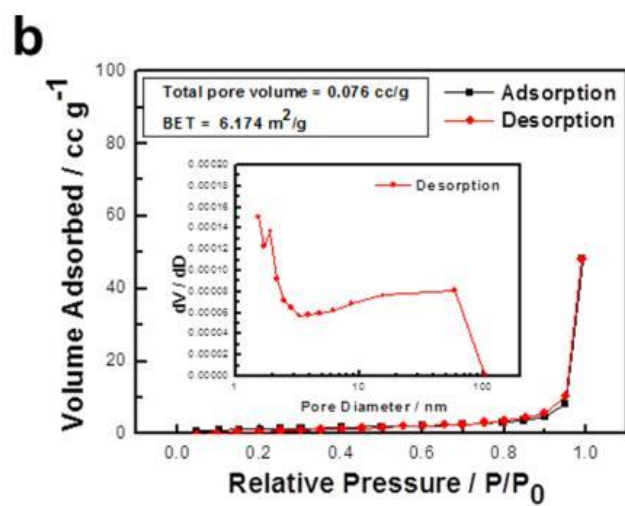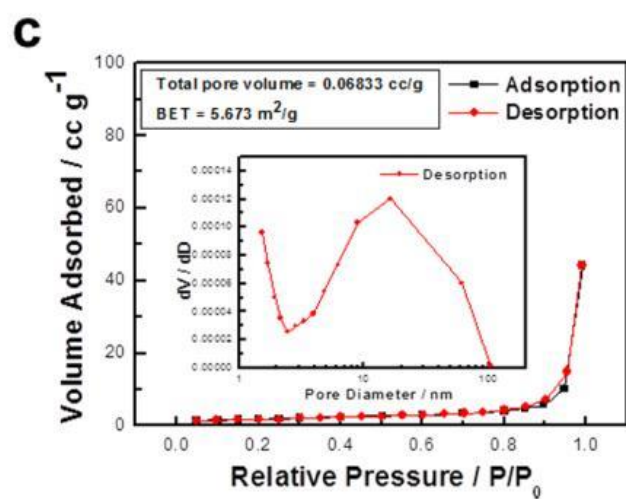

< Figure S6 >

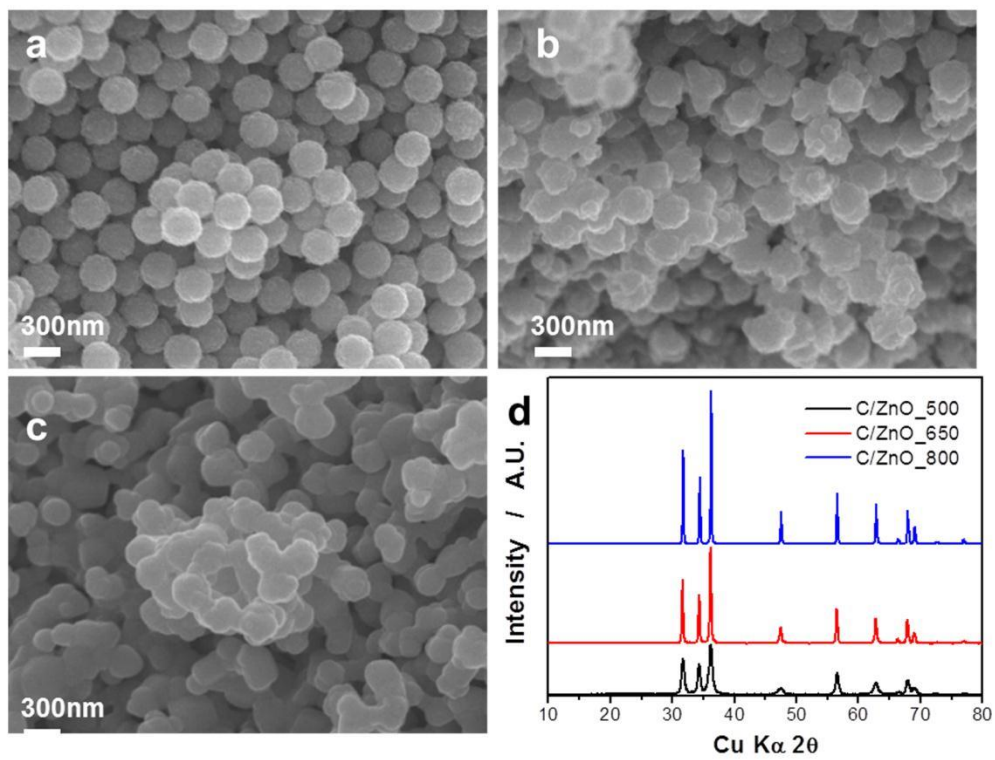

< Figure S7 >



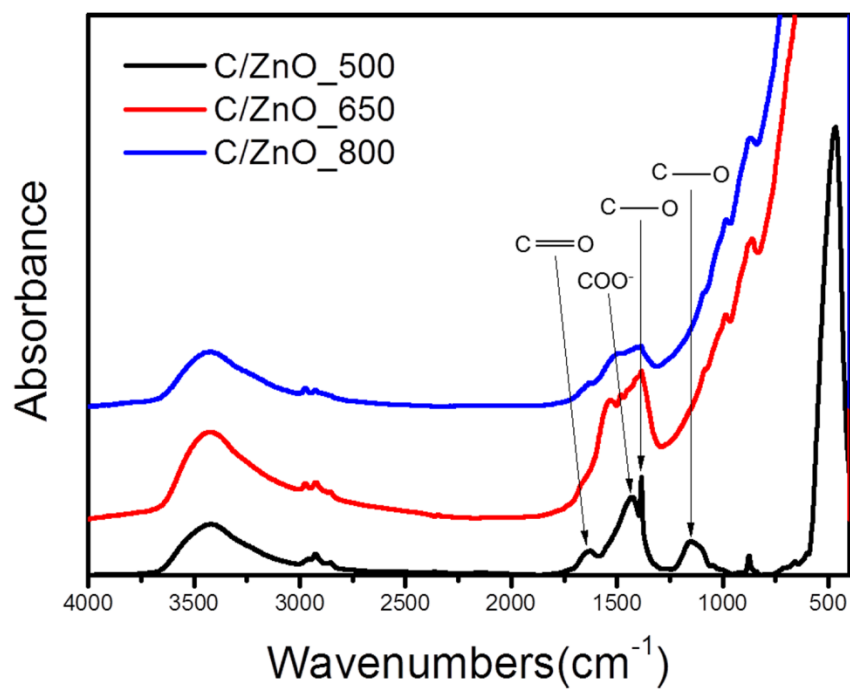

< Figure S8 >

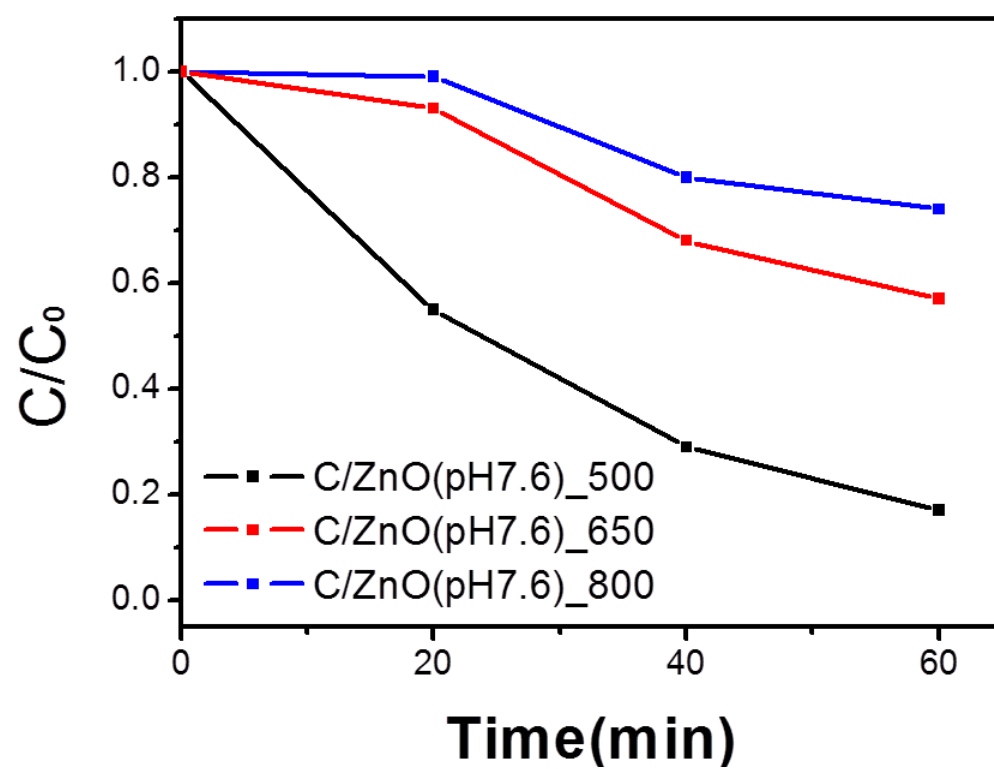

< Figure S9 >

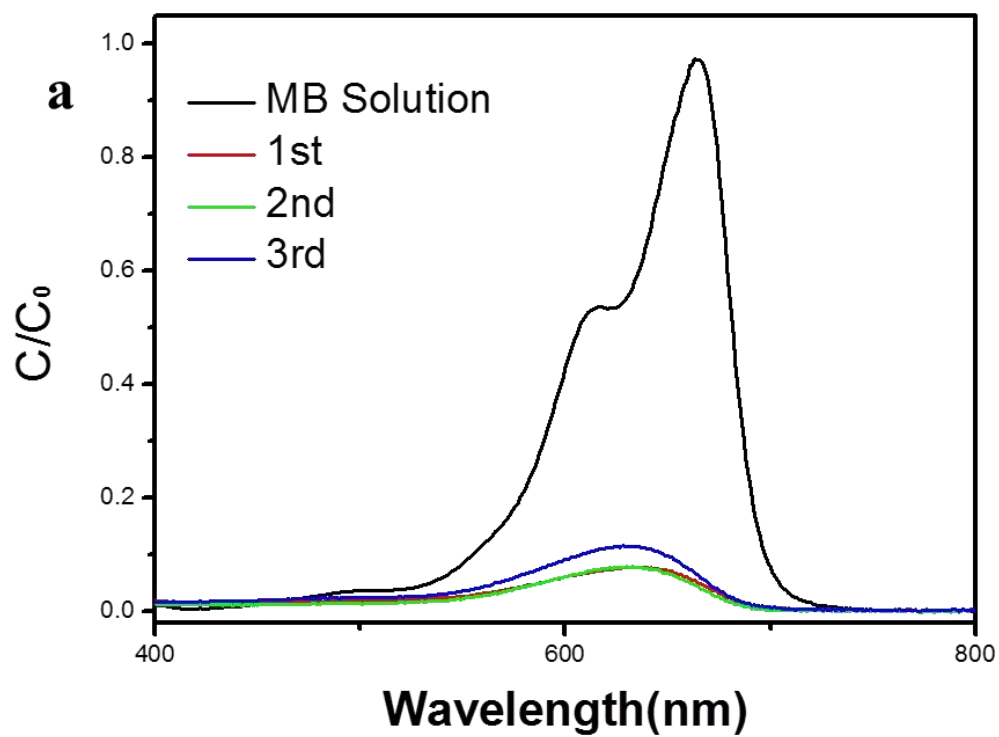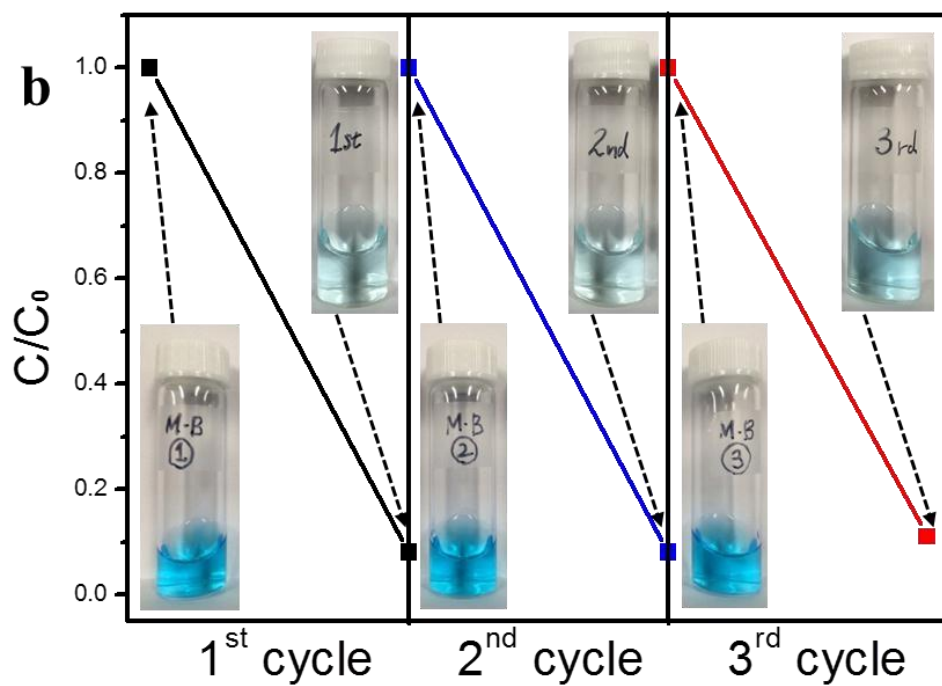

< Figure S10 >

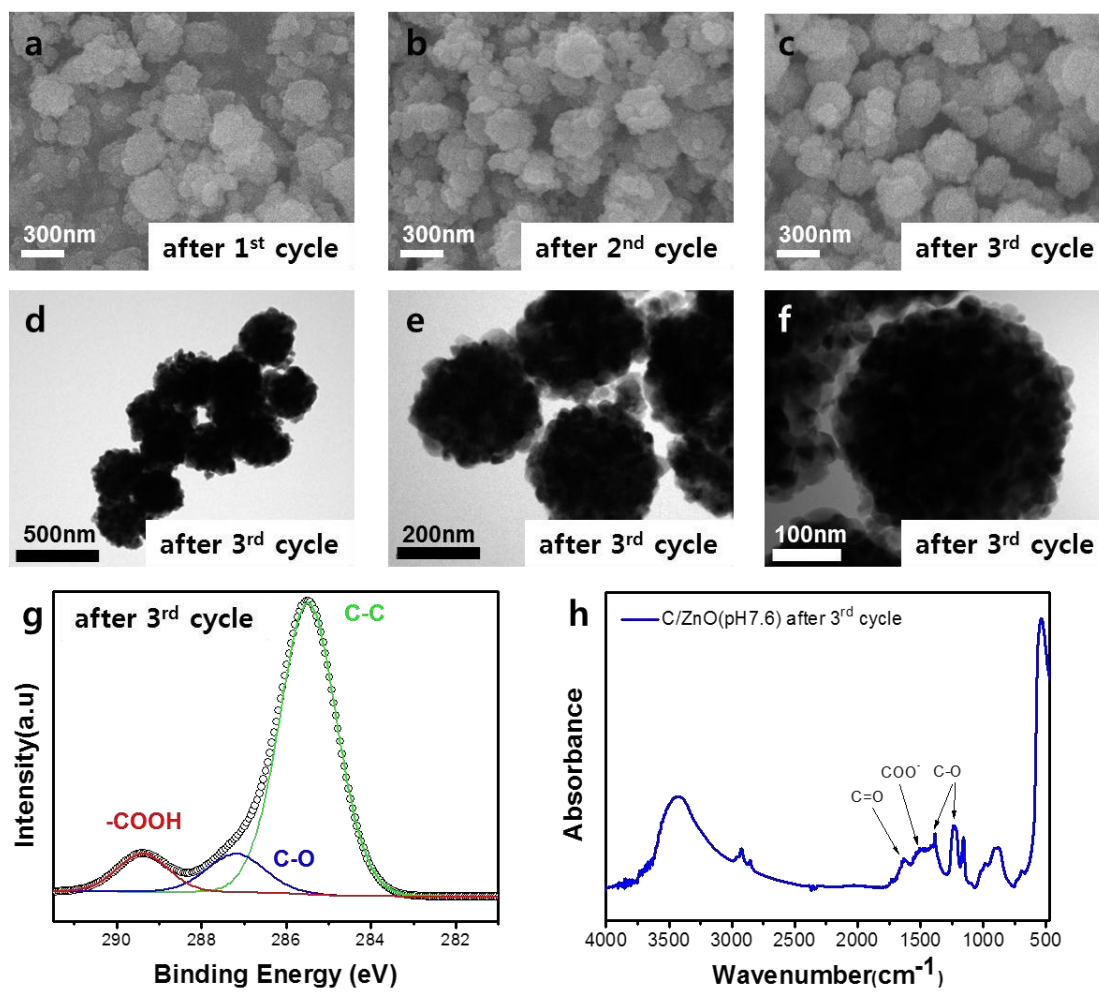

< Figure S11 >
